# Supplementary material
Source: PubMed Central journal article supplement (PMC7959245)
Supplement: NIHMS1620724-supplement-supp_info.pdf [file NIHMS1620724-supplement-supp_info.pdf]

## **Supplementary data**

A COP1-PIF-HEC regulatory module fine-tunes photomorphogenesis in *Arabidopsis*

Praveen Kumar Kathare, Xiaosa Xu, Andrew Nguyen and Enamul Huq

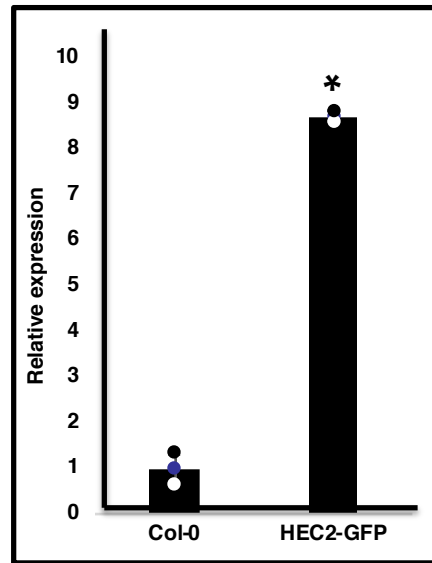

**Figure S1: *HEC2* mRNA level in *HEC2-GFP* overexpression seedlings.**

Bar graph showing the expression levels of *HEC2* in wild type and *HEC2-GFP* seedlings. Four-day-old dark-grown seedlings were harvested for RNA isolation. *PP2A* was used as an internal control for RT-qPCR. Error bars indicate standard deviation, \* indicates statistically significant difference compared to wild type based on student's t-test ( $p < 0.05$ ,  $n = 3$  independent biological repeats).

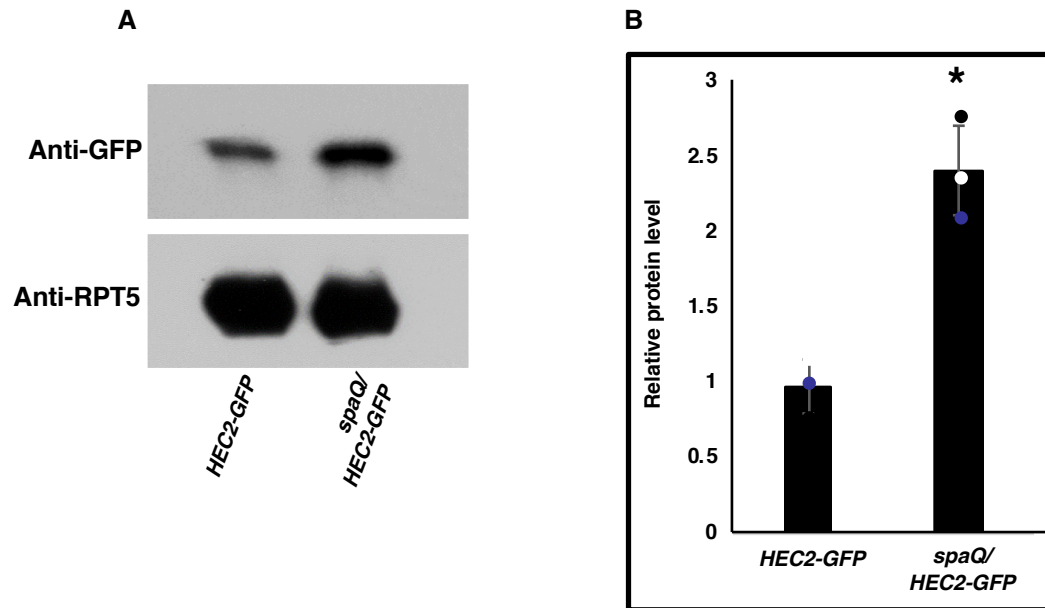

**Figure S2: HEC2-GFP is more abundant in *spaQ* compared to Col-0 background.**

(A) Immunoblots show the HEC2-GFP protein level in the 4-day old dark grown seedlings of *HEC2-GFP* transgenic seedlings in either Col-0 or *spaQ* background. (B) Quantification of relative HEC2-GFP protein level using western blot results from three independent experiments. RPT5 protein level was used for normalization. Error bars indicate SEM (n=3 biological repeats). Asterisk indicates significant difference between the two genotypes. \*P<0.01 by student's t-test.

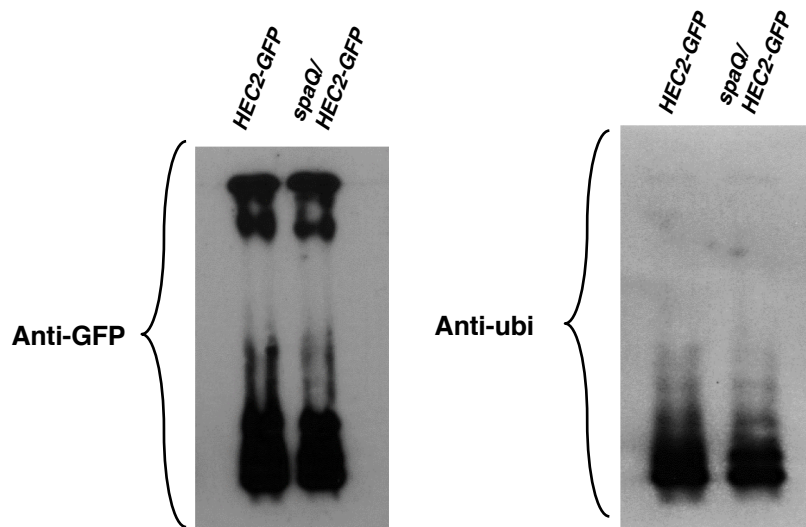

**Figure S3: SPA proteins promote HEC2 polyubiquitylation *in vivo*.**

The ubiquitylation level of HEC2-GFP is lower in the *spaQ* compared with Col-0 background in darkness. Total protein was extracted from 4 day-old dark grown seedlings and HEC2-GFP was immunoprecipitated using anti-GFP antibody (Rabbit). The immunoprecipitated samples were then separated on 10% SDS-PAGE gels and probed with anti-GFP (Mouse) (Left blot) or anti-Ub antibodies (Right blot).

---

**Supplementary Table S1: Primer sequences used in experiments described in the text.**

| <b>Gene</b>                | <b>Forward</b>                                            | <b>Reverse</b>                                            |
|----------------------------|-----------------------------------------------------------|-----------------------------------------------------------|
| <b><u>qRT-PCR</u></b>      |                                                           |                                                           |
| <i>PP2A</i>                | TATCGGATGACGATTCTTCGTGCAG                                 | GCTTGGTCGACTATCGGAATGAGAG                                 |
| <i>GFP</i>                 | AAGCTGACCCTGAAGTTCATCTGC                                  | CTGTAGTTGCCGTCGTCCTTGAA                                   |
| <br>                       |                                                           |                                                           |
| <b><u>BiFC Cloning</u></b> |                                                           |                                                           |
| HEC2                       | CACCATGGATAACTCCGACATTCTAATGA                             | TCTAAGAATCTGTGCATTTCCAAGC                                 |
| SPA1                       | GGGGACCACTTTGTACAAGAAAGCTGGGT-<br>GATGCCTGTTATGGAAAGAGTAG | GGGGACCACTTTGTACAAGAAAGCT-<br>GGGTGAACAAGTTTTAGTAGCTTCATG |
| COP1                       | CACCATGGAAGAGATTTTCGACGGATCCG                             | CGCAGCGAGTACCAGAACTTTGATG                                 |
